# Supplementary material for: Antithrombotic Treatment Patterns of Patients with Symptomatic Peripheral Arterial Occlusive Disease in Germany: Evidence from Health Insurance Claims Data
Source: MDPI journal article supplement (doi:10.3390/jcm11185455), 2022-09-16
Supplement: s1 [file s1]

## Electronic Supplement

Table S1. Codings used for identifying risk factors, comorbidities, prior diagnoses and in-hospital procedures.

|                                              | <b>International Classification of Diseases<br/>10th revision with German<br/>Modifications (ICD-10 GM) code</b>                                                                                                                                | <b>Anatomical<br/>Therapeutic<br/>Chemical<br/>(ATC) code</b> | <b>Operations and<br/>Procedures (OPS)<br/>code</b>                           |
|----------------------------------------------|-------------------------------------------------------------------------------------------------------------------------------------------------------------------------------------------------------------------------------------------------|---------------------------------------------------------------|-------------------------------------------------------------------------------|
| <b>Study population</b>                      |                                                                                                                                                                                                                                                 |                                                               |                                                                               |
| Peripheral arterial occlusive disease (PAOD) | Main diagnosis: <2015 I70.21-24 ; ≥2015 I70.21-25 or main diagnosis E10.50-51, E10.7, E11.50-51, E11.7, I73.0 I73.1 I73.8-9 I74.0-5 I74.8-9 L03.01-2 L03.11 L98.4 R02 in combination with secondary diagnosis <2015 I70.21-24 ; ≥2015 I70.21-25 |                                                               |                                                                               |
| <b>Obtained in-hospital treatment</b>        |                                                                                                                                                                                                                                                 |                                                               |                                                                               |
| Peripheral vascular intervention             |                                                                                                                                                                                                                                                 |                                                               | 8-836 8-840 to 8-849<br>8-83C 8-84A                                           |
| Open surgical repair                         |                                                                                                                                                                                                                                                 |                                                               | 5-380 to 5-384 5-38C<br>to 5-38F 5-393 to 5-<br>396 5-98A 5-38A.4 5-<br>38A.C |
| Minor or major amputation                    |                                                                                                                                                                                                                                                 |                                                               | 5-864 5-865                                                                   |
| <b>Medical history</b>                       |                                                                                                                                                                                                                                                 |                                                               |                                                                               |
| Congestive heart failure                     | I09.0 I11.0 I13.0 I13.2 I25.5 I42.0 I42.5-9<br>I43 I50 P29                                                                                                                                                                                      |                                                               |                                                                               |
| Cardiac arrhythmias                          | I44.1-3 I45.6 I45.9 I47 I48 I49 R00.0<br>R00.1 R00.8 T82.1 Z45.0 Z95.0                                                                                                                                                                          |                                                               |                                                                               |
| Valvular disease                             | A52.0 I05.0-2 I05.8-9 I06.0-2 I06.8-9<br>I07.0-2 I07.8-9 I08.0-3 I08.8-9 I09.1 I09.8<br>I34-I39 Q23 Z95.2-4                                                                                                                                     |                                                               |                                                                               |
| Diabetes, complicated                        | E10.2-8 E11.2-8 E12.2-8 E13.2-8 E14.2-8                                                                                                                                                                                                         |                                                               |                                                                               |
| Renal failure                                | I12.0 I13.1 N18 N19 N15.0 Z49 Z94.0<br>Z99.2                                                                                                                                                                                                    |                                                               |                                                                               |
| Liver disease                                | B18.0-2 B18.8-9 I85 I86.4 I98.2 K70<br>K71-74 K76 Z94.4                                                                                                                                                                                         |                                                               |                                                                               |
| Tumour/metastatic cancer                     | C00-C26 C30-C76 C97/C77-C80                                                                                                                                                                                                                     |                                                               |                                                                               |
| Dyslipidaemia                                | E78                                                                                                                                                                                                                                             |                                                               |                                                                               |
| Ischemic heart disease                       | I20-I25                                                                                                                                                                                                                                         |                                                               |                                                                               |
| Myocardial infarction                        | I20.0 I21-I24 Z03.4                                                                                                                                                                                                                             |                                                               |                                                                               |
| Stroke or TIA                                | I61 I63 I64 G45                                                                                                                                                                                                                                 |                                                               |                                                                               |
| Venous Thromboembolism                       | I26, I80, I81, I82.2, I82.9                                                                                                                                                                                                                     |                                                               |                                                                               |
| Atrial Fibrillation                          | I48                                                                                                                                                                                                                                             |                                                               |                                                                               |
| Hip or knee replacement                      |                                                                                                                                                                                                                                                 |                                                               | 5-820 to 5-823                                                                |
| <b>Medications</b>                           |                                                                                                                                                                                                                                                 |                                                               |                                                                               |
| Group 1, SAPT: Clopidogrel                   |                                                                                                                                                                                                                                                 | B01AC04                                                       |                                                                               |

|                                           |  |                               |  |
|-------------------------------------------|--|-------------------------------|--|
| Group 1, SAPT: ASS                        |  | B01AC06<br>B01AC56<br>B01AC86 |  |
| Group 2, DAPT: Clopidogrel +<br>ASS, dual |  | B01AC34                       |  |
| Group 3, VKA: Phenprocoumon               |  | B01AA04                       |  |
| Group 3, VKA: Warfarin                    |  | B01AA03                       |  |
| Group 4, DOAC: Dabigatran                 |  | B01AE07                       |  |
| Group 4, DOAC: Rivaroxaban                |  | B01AF01                       |  |
| Group 4, DOAC: Apixaban                   |  | B01AF02                       |  |
| Group 4, DOAC: Edoxaban                   |  | B01AF03                       |  |

Table S2. Baseline characteristics of the total study cohort and CLTI and IC patient, excluding patients suffering from atrial fibrillation within 1 year prior to index date, venous thromboembolism within 60 days prior to the index date, acute coronary syndrome within 1 year prior to index date and hip or knee replacement within 60 days prior to index date; SD: Standard Deviation; PAOD: Peripheral arterial occlusive disease; TIA: Transient ischaemic attack; CLTI: Chronic limb-threatening ischaemia, IC: Intermittent Claudication

|                                                  | <b>Total</b><br><b>(n=64,143)</b> | <b>CLTI</b><br><b>(n=28,234)</b> | <b>IC</b><br><b>(n=35,909)</b> |
|--------------------------------------------------|-----------------------------------|----------------------------------|--------------------------------|
| <b>Age, years, mean (SD)</b>                     | 71.16 (11.20)                     | 74.28 (11.79)                    | 68.71 (10.05)                  |
| <b>Female sex, n (%)</b>                         | 29520 (46.0)                      | 13727 (48.6)                     | 15793 (44.0)                   |
| <b>van Walraven Score &gt; 9, n (%)</b>          | 19140 (29.8)                      | 12090 (42.8)                     | 7050 (19.6)                    |
| <b>Best medical treatment, n (%)</b>             | 12603 (19.6)                      | 7849 (27.8)                      | 4754 (13.2)                    |
| <b>Peripheral vascular intervention, n (%)</b>   | 33052 (51.5)                      | 10819 (38.3)                     | 22233 (61.9)                   |
| <b>Open surgical repair, n (%)</b>               | 15808 (24.6)                      | 6963 (24.7)                      | 8845 (24.6)                    |
| <b>Amputation only, n (%)</b>                    | 2680 (4.2)                        | 2603 (9.2)                       | 77 (0.2)                       |
| <b>Congestive heart failure, n (%)</b>           | 13354 (20.8)                      | 8411 (29.8)                      | 4943 (13.8)                    |
| <b>Cardiac arrhythmias, n (%)</b>                | 8360 (13.0)                       | 4843 (17.2)                      | 3517 (9.8)                     |
| <b>Valvular disease, n (%)</b>                   | 5160 (8.0)                        | 3048 (10.8)                      | 2112 (5.9)                     |
| <b>Hypertension, n (%)</b>                       | 51205 (79.8)                      | 23126 (81.9)                     | 28079 (78.2)                   |
| <b>Diabetes (complicated), n (%)</b>             | 16793 (26.2)                      | 11313 (40.1)                     | 5480 (15.3)                    |
| <b>Renal failure, n (%)</b>                      | 16767 (26.1)                      | 10135 (35.9)                     | 6632 (18.5)                    |
| <b>Liver disease, n (%)</b>                      | 2807 (4.4)                        | 1603 (5.7)                       | 1204 (3.4)                     |
| <b>Solid tumor or metastatic cancer, n (%)</b>   | 4732 (7.4)                        | 2359 (8.4)                       | 2373 (6.6)                     |
| <b>Dyslipidaemia, n (%)</b>                      | 30524 (47.6)                      | 12121 (42.9)                     | 18403 (51.2)                   |
| <b>History of coronary artery disease, n (%)</b> | 20542 (32.0)                      | 9697 (34.3)                      | 10845 (30.2)                   |
| <b>Prior myocardial infarction, n (%)</b>        | 7961 (12.4)                       | 3818 (13.5)                      | 4143 (11.5)                    |
| <b>Prior stroke or TIA, n (%)</b>                | 5155 (8.0)                        | 3042 (10.8)                      | 2113 (5.9)                     |
| <b>History of bleeding, n (%)</b>                | 13386 (20.9)                      | 8251 (29.2)                      | 5135 (14.3)                    |

Table S3: Observed and estimated treatment patterns of the total study cohort (a), CLTI (b) and IC (c) patients, excluding patients suffering from atrial fibrillation within 1 year prior to index date, venous thromboembolism within 60 days prior to the index date, acute coronary syndrome within 1 year prior to index date and hip or knee replacement within 60 days prior to index date; SAPT: Single antiplatelet therapy, DAPT: Dual antiplatelet therapy, VKA: Vitamin-K-antagonists, DOAC: Direct oral anticoagulation, DPI: Dual pathway inhibition, IC: Intermittent claudication, CLTI: Chronic limb-threatening ischaemia, CI: Confidence interval), #No confidence interval available

(a)

| <b>Total (n=64,143)</b>  | <b>12 months prior, observed</b> | <b>6 months after, estimated,95% CI</b> |
|--------------------------|----------------------------------|-----------------------------------------|
| <b>SAPT, n (%)</b>       | 18026 (28.1)                     | 42.3 (41.9-42.7)                        |
| <b>DAPT, n (%)</b>       | 2872 (4.5)                       | 16.8 (16.6-17.1)                        |
| <b>VKA, n (%)</b>        | 2167 (3.4)                       | 3.9 (3.7-4.0)                           |
| <b>DOAC, n (%)</b>       | 764 (1.2)                        | 1.6 (1.5-1.7)                           |
| <b>DPI, n (%)</b>        | 843 (1.3)                        | 3.9 (3.8-4.1)                           |
| <b>No therapy, n (%)</b> | 39471 (61.5)                     | 31.5 <sup>#</sup>                       |

(b)

| <b>CLTI (n=28,234)</b>   | <b>12 months prior, observed</b> | <b>6 months after, estimated,95% CI</b> |
|--------------------------|----------------------------------|-----------------------------------------|
| <b>SAPT, n (%)</b>       | 7894 (28)                        | 39.6 (39-40.2)                          |
| <b>DAPT, n (%)</b>       | 1130 (4.0)                       | 14.5 (14.1-15)                          |
| <b>VKA, n (%)</b>        | 1374 (4.9)                       | 5.5 (5.2-5.8)                           |
| <b>DOAC, n (%)</b>       | 469 (1.7)                        | 2.2 (2.1-2.4)                           |
| <b>DPI, n (%)</b>        | 468 (1.7)                        | 5.2 (5-5.5)                             |
| <b>No therapy, n (%)</b> | 16899 (59.9)                     | 33.0 <sup>#</sup>                       |

(c)

| <b>IC (n=35,909)</b>     | <b>12 months prior, observed</b> | <b>6 months after, estimated,95% CI</b> |
|--------------------------|----------------------------------|-----------------------------------------|
| <b>SAPT, n (%)</b>       | 10132 (28.2)                     | 44.4 (43.9-44.9)                        |
| <b>DAPT, n (%)</b>       | 1742 (4.9)                       | 18.6 (18.2-19)                          |
| <b>VKA, n (%)</b>        | 793 (2.2)                        | 2.7 (2.5-2.8)                           |
| <b>DOAC, n (%)</b>       | 295 (0.8)                        | 1.1 (1.0-1.2)                           |
| <b>DPI, n (%)</b>        | 375 (1.0)                        | 2.9 (2.7-3.1)                           |
| <b>No therapy, n (%)</b> | 22572 (62.9)                     | 30.4 <sup>#</sup>                       |

Table S4: Prior studies on the prescription of antithrombotics in patients with Peripheral arterial occlusive disease (PAOD) [1–17]; IC: Intermittent claudication , CLTI: Chronic limb-threatening ischaemia, CVD: Cardiovascular disease, MI: Myocardial infarction, APT: Antiplatelet therapy, OAC: Oral anticoagulation; we estimated upper bounds of antiplatelet use if medication use was not assessed mutually exclusive

| Author                  | Year        | Country   | Patient subgroups  | N             | Female     | Mean age  | APT        | OAC        |
|-------------------------|-------------|-----------|--------------------|---------------|------------|-----------|------------|------------|
| Lee et al. [1]          | 2020        | KR        | PAOD               | 765           | 18%        | 67        | 98%        | -          |
| Hageman et al. [2]      | 2020        | NL        | PAOD, CVD          | 1,455         | 32%        | 60        | 55%        | 14%        |
| Mustapha et al. [3]     | 2020        | US        | CLTI               | 404           | 33%        | 69        | 92%        | 11%        |
| Galas et al. [4]        | 2019        | DE        | PAOD, nursing home | 1,329         | 71%        | 84        | ≤ 41%      | 15%        |
| Sigvant et al. [5]      | 2019        | SE        | MI, PAOD           | 52,408        | 49%        | 74        | ≤ 72%      | -          |
| Arruda-Olson et al. [7] | 2018        | US        | PAOD               | 1,676         | 45%        | 72        | 60%        | -          |
| Cea Soriano et al. [9]  | 2017        | UK        | symptomatic PAOD   | 28,484        | 40%        | -         | ≤ 23%      | -          |
| Sigvant et al. [10]     | 2016        | SE        | PAOD               | 18,742        | 49%        | 74        | ≤ 73%      | -          |
| Hussain et al. [11]     | 2016        | CA        | PAOD               | 2,686         | 35%        | 70        | 67%        | 15%        |
| Coveney et al. [12]     | 2011        | IE        | Arterial disease   | 180           | 21%        | 69        | ≤ 87%      | 8%         |
| Müller-Bühl et al. [13] | 2011        | DE        | PAOD               | 479           | 44%        | 47        | ≤ 64%      | 12%        |
| Pande et al. [14]       | 2011        | US        | PAOD               | 7,458         | 58%        | 68        | 39%        | -          |
| Stansby et al. [15]     | 2011        | UK        | IC                 | 473           | 34%        | 68        | 70%        | 4%         |
| Soga et al. [16]        | 2010        | JP        | IC                 | 271           | 18%        | 68        | 92%        | -          |
| Paquet et al. [17]      | 2010        | CA        | PAOD               | 5,962         | 44%        | 73        | 72%        | -          |
| <b>Our study</b>        | <b>2020</b> | <b>DE</b> | <b>PAOD</b>        | <b>80,426</b> | <b>46%</b> | <b>73</b> | <b>60%</b> | <b>19%</b> |

## References

1. Lee, M.S.; Choi, B.G.; Rha, S.W. Impact of diabetes mellitus on 5-year clinical outcomes following successful endovascular revascularization for peripheral artery disease. *Vasc Med* **2020**, *25*, 33-40, doi:10.1177/1358863x19879751.
2. Hageman, S.H.J.; de Borst, G.J.; Dorresteyn, J.A.N.; Bots, M.L.; Westerink, J.; Asselbergs, F.W.; Visseren, F.L.J. Cardiovascular risk factors and the risk of major adverse limb events in patients with symptomatic cardiovascular disease. *Heart* **2020**, 10.1136/heartjnl-2019-316088, doi:10.1136/heartjnl-2019-316088.
3. Mustapha, J.; Gray, W.; Martinsen, B.J.; Bolduan, R.W.; Adams, G.L.; Ansel, G.; Jaff, M.R. One-Year Results of the LIBERTY 360 Study: Evaluation of Acute and Midterm Clinical Outcomes of Peripheral Endovascular Device Interventions. *J Endovasc Ther* **2020**, *26*, 143-154, doi:10.1177/1526602819827295.
4. Galas, N.; Becker, I.; Ficon, T.; Sakrauski, M.; Reichert, R.; Ahmad, W.; Mylonas, S.; Brunkwall, J.; Majd, P. Prescription rate of anti-atherosclerotic drugs in German nursing homes and its impact on outcome. *Vasa* **2019**, *48*, 158-166, doi:10.1024/0301-1526/a000754.
5. Sigvant, B.; Hasvold, P.; Thureson, M.; Jernberg, T.; Janzon, M.; Nordanstig, J. Myocardial infarction and peripheral arterial disease: Treatment patterns and long-term outcome in men and women results from a Swedish nationwide study. *Eur J Prev Cardiol* **2019**, 10.1177/2047487319893046, 2047487319893046, doi:10.1177/2047487319893046.
6. Kawarada, O.; Nakai, M.; Nishimura, K.; Miwa, H.; Iwasaki, Y.; Kanno, D.; Nakama, T.; Yamamoto, Y.; Ogata, N.; Nakamura, M.; et al. Antithrombotic therapy after femoropopliteal artery stenting: 12-month results from Japan Postmarketing Surveillance. *Heart Asia* **2019**, *11*, e011114, doi:10.1136/heartasia-2018-011114.
7. Arruda-Olson, A.M.; Afzal, N.; Priya Mallipeddi, V.; Said, A.; Moussa Pacha, H.; Moon, S.; Chaudhry, A.P.; Scott, C.G.; Bailey, K.R.; Rooke, T.W.; et al. Leveraging the Electronic Health Record to Create an Automated Real-Time Prognostic Tool for Peripheral Arterial Disease. *J Am Heart Assoc* **2018**, *7*, e009680, doi:10.1161/jaha.118.009680.
8. Norgren, L.; Patel, M.R.; Hiatt, W.R.; Wojdyla, D.M.; Fowkes, F.G.R.; Baumgartner, I.; Mahaffey, K.W.; Berger, J.S.; Jones, W.S.; Katona, B.G.; et al. Outcomes of Patients with Critical Limb Ischaemia in the EUCLID Trial. *Eur J Vasc Endovasc Surg* **2018**, *55*, 109-117, doi:10.1016/j.ejvs.2017.11.006.
9. Cea Soriano, L.; Fowkes, F.G.R.; Johansson, S.; Allum, A.M.; Garcia Rodriguez, L.A. Cardiovascular outcomes for patients with symptomatic peripheral artery disease: A cohort study in The Health Improvement Network (THIN) in the UK. *Eur J Prev Cardiol* **2017**, *24*, 1927-1937, doi:10.1177/2047487317736824.
10. Sigvant, B.; Kragsterman, B.; Falkenberg, M.; Hasvold, P.; Johansson, S.; Thureson, M.; Nordanstig, J. Contemporary cardiovascular risk and secondary preventive drug treatment patterns in peripheral artery disease patients undergoing revascularization. *J Vasc Surg* **2016**, *64*, 1009-1017.e1003, doi:10.1016/j.jvs.2016.03.429.
11. Hussain, M.A.; Al-Omran, M.; Mamdani, M.; Eisenberg, N.; Premji, A.; Saldanha, L.; Wang, X.; Verma, S.; Lindsay, T.F. Efficacy of a Guideline-Recommended Risk-Reduction Program to Improve Cardiovascular and Limb Outcomes in Patients With Peripheral Arterial Disease. *JAMA Surg* **2016**, *151*, 742-750, doi:10.1001/jamasurg.2016.0415.
12. Coveney, A.P.; O'Brien, G.C.; Fulton, G.J. ACE up the sleeve - are vascular patients medically optimized? *Vasc Health Risk Manag* **2011**, *7*, 15-21, doi:10.2147/vhrm.S15484.
13. Muller-Buhl, U.; Laux, G.; Szecsenyi, J. Secondary Pharmacotherapeutic Prevention among German Primary Care Patients with Peripheral Arterial Disease. *Int J Vasc Med* **2011**, *2011*, 316496, doi:10.1155/2011/316496.
14. Pande, R.L.; Perlstein, T.S.; Beckman, J.A.; Creager, M.A. Secondary prevention and mortality in peripheral artery disease: National Health and Nutrition Examination Study, 1999 to 2004. *Circulation* **2011**, *124*, 17-23, doi:10.1161/circulationaha.110.003954.

15. Stansby, G.; Mister, R.; Fowkes, G.; Roughton, M.; Nugara, F.; Brittenden, J.; Bradbury, A.; Ashley, S.; Shearman, C.; Hannon, R.; et al. High risk of peripheral arterial disease in the United Kingdom: 2-year results of a prospective registry. *Angiology* **2011**, *62*, 111-118, doi:10.1177/0003319710387917.
16. Soga, Y.; Yokoi, H.; Urakawa, T.; Tosaka, A.; Iwabuchi, M.; Nobuyoshi, M. Long-term clinical outcome after endovascular treatment in patients with intermittent claudication due to iliofemoral artery disease. *Circ J* **2010**, *74*, 1689-1695, doi:10.1253/circj.cj-10-0077.
17. Paquet, M.; Pilon, D.; Tetrault, J.P.; Carrier, N. Protective vascular treatment of patients with peripheral arterial disease: guideline adherence according to year, age and gender. *Can J Public Health* **2010**, *101*, 96-100.
